# Supplementary material for: Dual-cubic-cage based lanthanide sulfate–carboxylpyrazolate frameworks with high hydrolytic stability and remarkable proton conduction
Source: Royal Society of Chemistry journal article supplement (doi:10.1039/c8cc09474h), 2019-01-01
Supplement: c8cc09474h1.pdf [file c8cc09474h1.pdf]

Electronic Supporting Information for

**Dual-cubic-cage based lanthanide sulfate-  
carboxylpyrazolate frameworks with highly hydrolytic  
stability and remarkable proton conduction**

Liang He,<sup>a,b</sup> Jayanta Kumar Nath,<sup>a</sup> Erxia Chen,<sup>a</sup> Hengdong Lai,<sup>a</sup> Shanlin Huang<sup>a</sup> and  
Qipu Lin<sup>\*,a</sup>

<sup>a</sup>*State Key Laboratory of Structural Chemistry Fujian Institute of Research on the  
Structure of Matter, Chinese Academy of Sciences, Fuzhou, Fujian 350002, China*

<sup>b</sup>*College of Materials Science and Engineering Fujian Normal University, Fuzhou,  
Fujian 350007, China*

\*Corresponding Author: Email: [lingipu@fjirsm.ac.cn](mailto:lingipu@fjirsm.ac.cn)

## **Table of Contents**

**Section S1:** General Methods

**Section S2:** Synthetic Procedures of Ln-SCP

**Section S3:** Crystallographic Data

**Section S4:** Structural Pictures

**Section S5:** Photography

**Section S6:** Fourier-Transform Infrared (FT-IR) Spectroscopy

**Section S7:** Powder X-ray Diffraction (PXRD)

**Section S8:** Stability Analysis

**Section S9:** Gas-Sorption Measurements

**Section S10:** Ultraviolet-Visible (UV-Vis) Spectroscopy

**Section S11:** Photoluminescence

**Section S12:** Magnetism

**Section S13:** Proton Conduction

**Section S14:** References

---

## **Section S1: General Methods**

**Chemicals:** All chemical reagents were obtained from commercial supplies without further purification.

**Instrumentation:** Elemental analysis (EA) was carried out on a Vario EL-Cube. Powder X-ray diffraction (PXRD) patterns of the samples were recorded by a Rigaku Dmax 2500 X-ray diffractometer with Cu  $K\alpha$  radiation ( $\lambda = 1.54056 \text{ \AA}$ ). Metal contents were measured by an Ultima2 (Horiba Jobin Yvon) inductively coupled plasma optical emission spectrometer (ICP-OES). Thermal analysis was carried out on a Netzsch STA449C thermal analyzer at a temperature range of 25 to 800 °C under air atmosphere with a heating rate of 10 °C min<sup>-1</sup>. Gas sorption measurements were performed on a Micromeritics ASAP 2020 surface area and pore size analyzer. Fourier-transform infrared (FT-IR) spectra were recorded using a Nicolet iS10 spectrophotometer in 3750~450 cm<sup>-1</sup> region.

---

## Section S2: Synthetic Procedures of Ln-SCP

### (1) Synthesis of Eu-SCP

Eu<sub>2</sub>O<sub>3</sub> (0.25 mmol, 0.088 g), H<sub>3</sub>PDC (0.5 mmol, 0.086 g), ZnSO<sub>4</sub>·7H<sub>2</sub>O (0.25 mmol, 0.072 g) and water (15 mL) were mixed in a 23 mL teflon-lined stainless steel container and stirred for 30 min, then heated to 150 °C for 60 h. After cooling to room temperature at 5 °C min<sup>-1</sup>, single crystals were obtained after washing with water (ca. 35% yield based on H<sub>3</sub>PDC). EA data: C 11.76%; H 2.43%; N 5.36%; S 4.50. ICP data: Eu 39.40%; Zn 0.94%.

### (2) Synthesis of Gd-SCP

Gd<sub>2</sub>O<sub>3</sub> (0.25 mmol, 0.091 g), H<sub>3</sub>PDC (0.5 mmol, 0.086 g), ZnSO<sub>4</sub>·7H<sub>2</sub>O (0.25 mmol, 0.072 g) and water (15 mL) were mixed in a 23 mL teflon-lined stainless steel container and stirred for 30 min, then heated to 150 °C for 60 h. After cooling to room temperature at 5 °C min<sup>-1</sup>, single crystals were obtained after washing with water (ca. 35% yield based on H<sub>3</sub>PDC). EA data: C 12.71%; H 2.37%; N 5.89%; S 4.67. ICP data: Gd 37.46%; Zn 1.44%.

### (3) Synthesis of Dy-SCP

Dy<sub>2</sub>O<sub>3</sub> (0.25 mmol, 0.093 g), H<sub>3</sub>PDC (0.5 mmol, 0.086 g), ZnSO<sub>4</sub>·7H<sub>2</sub>O (0.25 mmol, 0.072 g) and water (15 mL) were mixed in a 23 mL teflon-lined stainless steel container and stirred for 30 min, then heated to 150 °C for 60 h. After cooling to room temperature at 5 °C min<sup>-1</sup>, single crystals were obtained after washing with water (ca. 35% yield based on H<sub>3</sub>PDC). EA data: C 10.26%; H 2.35%; N 4.98%; S 5.13. ICP data: Dy 40.56%; Zn 1.53%.

### (4) Synthesis of Ho-SCP

Ho<sub>2</sub>O<sub>3</sub> (0.25 mmol, 0.094 g), H<sub>3</sub>PDC (0.5 mmol, 0.086 g), ZnSO<sub>4</sub>·7H<sub>2</sub>O (0.25 mmol, 0.072 g) and water (15 mL) were mixed in a 23 mL teflon-lined stainless steel container and stirred for 30 min, then heated to 150 °C for 60 h. After cooling to room temperature at 5 °C min<sup>-1</sup>, single crystals were obtained after washing with water (ca. 30% yield based on H<sub>3</sub>PDC). EA data: C 9.13%; H 2.24%; N 4.23%; S 5.54. ICP data: Ho 38.21%; Zn 1.00%.

## Section S3: Crystallographic Data

**Table S1** Crystallographic data of Ln-SCP

| Compound Reference                                                            | Eu-SCP                                                                                                             | Gd-SCP                                                                                                             | Dy-SCP                                                                                                             | Ho-SCP                                                                                                             |
|-------------------------------------------------------------------------------|--------------------------------------------------------------------------------------------------------------------|--------------------------------------------------------------------------------------------------------------------|--------------------------------------------------------------------------------------------------------------------|--------------------------------------------------------------------------------------------------------------------|
| Chemical Formula                                                              | (C <sub>60</sub> H <sub>96</sub> Eu <sub>20</sub> N <sub>24</sub> O <sub>138</sub> S <sub>12</sub> )·<br>[+guests] | (C <sub>60</sub> H <sub>96</sub> Gd <sub>20</sub> N <sub>24</sub> O <sub>138</sub> S <sub>12</sub> )·<br>[+guests] | (C <sub>60</sub> H <sub>96</sub> Dy <sub>20</sub> N <sub>24</sub> O <sub>138</sub> S <sub>12</sub> )·<br>[+guests] | (C <sub>60</sub> H <sub>96</sub> Ho <sub>20</sub> N <sub>24</sub> O <sub>138</sub> S <sub>12</sub> )·<br>[+guests] |
| Formula Mass                                                                  | 7052.59                                                                                                            | 7162.04                                                                                                            | 7270.54                                                                                                            | 7320.77                                                                                                            |
| Crystal System                                                                | Cubic                                                                                                              | Cubic                                                                                                              | Cubic                                                                                                              | Cubic                                                                                                              |
| <i>a</i> /Å                                                                   | 17.7222(4)                                                                                                         | 17.7222(4)                                                                                                         | 17.5393(3)                                                                                                         | 17.5393(3)                                                                                                         |
| <i>b</i> /Å                                                                   | 17.7222(4)                                                                                                         | 17.7222(4)                                                                                                         | 17.5393(3)                                                                                                         | 17.5393(3)                                                                                                         |
| <i>c</i> /Å                                                                   | 17.7222(4)                                                                                                         | 17.7222(4)                                                                                                         | 17.5393(3)                                                                                                         | 17.5393(3)                                                                                                         |
| <i>α</i> /°                                                                   | 90                                                                                                                 | 90                                                                                                                 | 90                                                                                                                 | 90                                                                                                                 |
| <i>β</i> /°                                                                   | 90                                                                                                                 | 90                                                                                                                 | 90                                                                                                                 | 90                                                                                                                 |
| <i>γ</i> /°                                                                   | 90                                                                                                                 | 90                                                                                                                 | 90                                                                                                                 | 90                                                                                                                 |
| Unit-Cell Volume/<br>Å <sup>3</sup>                                           | 5566.1(4)                                                                                                          | 5566.1(4)                                                                                                          | 5395.6(3)                                                                                                          | 5395.6(3)                                                                                                          |
| Temperature/K                                                                 | 293(2)                                                                                                             | 293(2)                                                                                                             | 293(2)                                                                                                             | 293(2)                                                                                                             |
| Space Group                                                                   | <i>Pm</i> -3                                                                                                       | <i>Pm</i> -3                                                                                                       | <i>Pm</i> -3                                                                                                       | <i>Pm</i> -3                                                                                                       |
| No. of Formula Units Per Unit-Cell, <i>Z</i>                                  | 1                                                                                                                  | 1                                                                                                                  | 1                                                                                                                  | 1                                                                                                                  |
| No. of Reflections Measured                                                   | 36501                                                                                                              | 36309                                                                                                              | 34574                                                                                                              | 41961                                                                                                              |
| No. of Independent Reflections                                                | 1817                                                                                                               | 1805                                                                                                               | 2270                                                                                                               | 2239                                                                                                               |
| <i>R</i> <sub>int</sub>                                                       | 0.0537                                                                                                             | 0.0831                                                                                                             | 0.0423                                                                                                             | 0.0252                                                                                                             |
| Final <i>R</i> <sub>1</sub> Values ( <i>I</i> > 2σ( <i>I</i> ))               | 0.0349                                                                                                             | 0.0416                                                                                                             | 0.0217                                                                                                             | 0.0219                                                                                                             |
| Final <i>wR</i> ( <i>F</i> <sup>2</sup> ) Values ( <i>I</i> > 2σ( <i>I</i> )) | 0.0794                                                                                                             | 0.0934                                                                                                             | 0.0559                                                                                                             | 0.0639                                                                                                             |
| Final <i>R</i> <sub>1</sub> Values (all data)                                 | 0.0349                                                                                                             | 0.0416                                                                                                             | 0.0225                                                                                                             | 0.0220                                                                                                             |
| Final <i>wR</i> ( <i>F</i> <sup>2</sup> ) Values (all data)                   | 0.0794                                                                                                             | 0.0934                                                                                                             | 0.0565                                                                                                             | 0.0643                                                                                                             |
| Goodness of Fit on <i>F</i> <sup>2</sup>                                      | 1.064                                                                                                              | 1.042                                                                                                              | 1.046                                                                                                              | 1.016                                                                                                              |
| CCDC Number                                                                   | 1880636                                                                                                            | 1880637                                                                                                            | 1880638                                                                                                            | 1880639                                                                                                            |

## Section S4: Structural Pictures

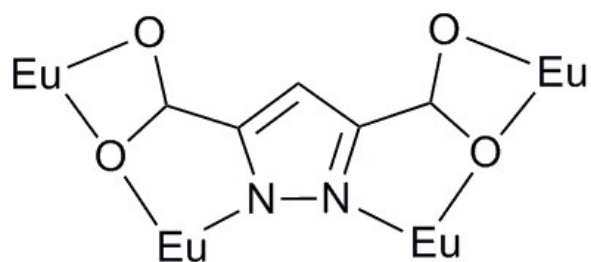

**Fig. S1** PDC<sup>3-</sup> ligand and its coordination mode in Eu-SCP.

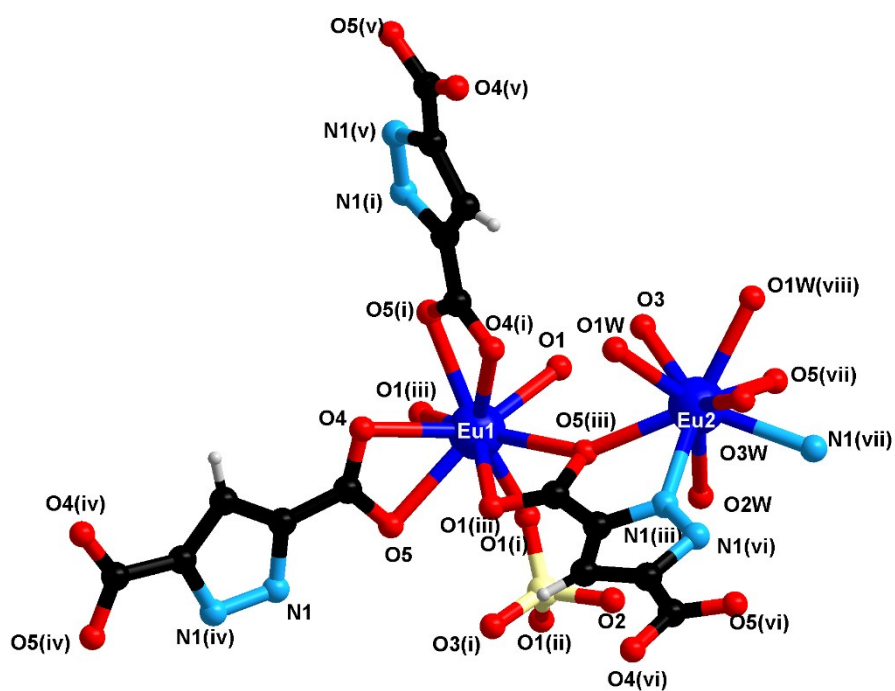

**Fig. S2** Coordination environments of Eu<sup>3+</sup> ions in Eu-SCP (symmetry codes: (i)  $y, z, x$ ; (ii)  $-y, z, x$ ; (iii)  $z, x, y$ ; (iv)  $x, 1-y, z$ ; (v)  $1-y, z, x$ ; (vi)  $z, x, 1-y$ ; (vii)  $z, -x, y$ ; (viii)  $x, -y, z$ ).

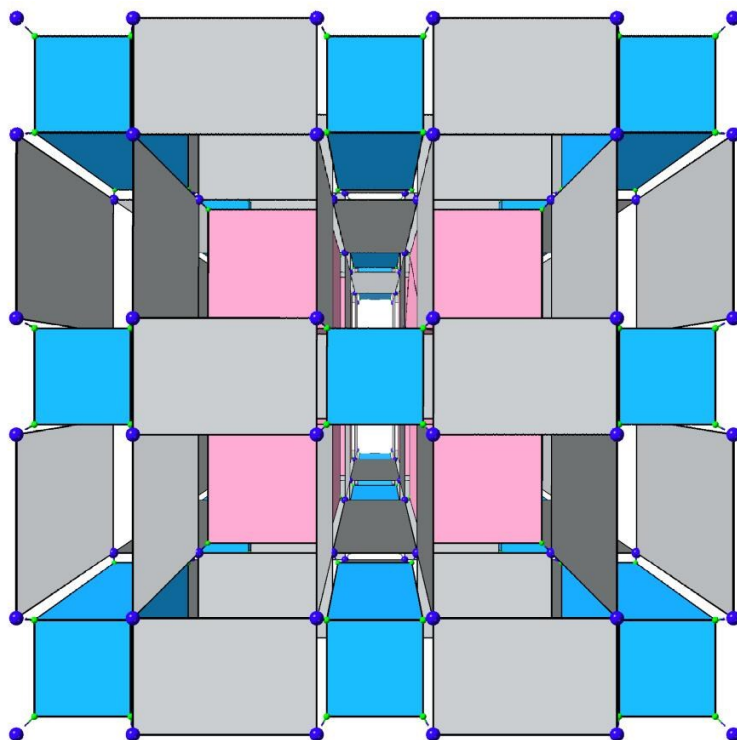

**Fig. S3** Rectangular tile-based structure of Eu-SCP containing two kinds of cubic cages denoted by pink and blue cubes.

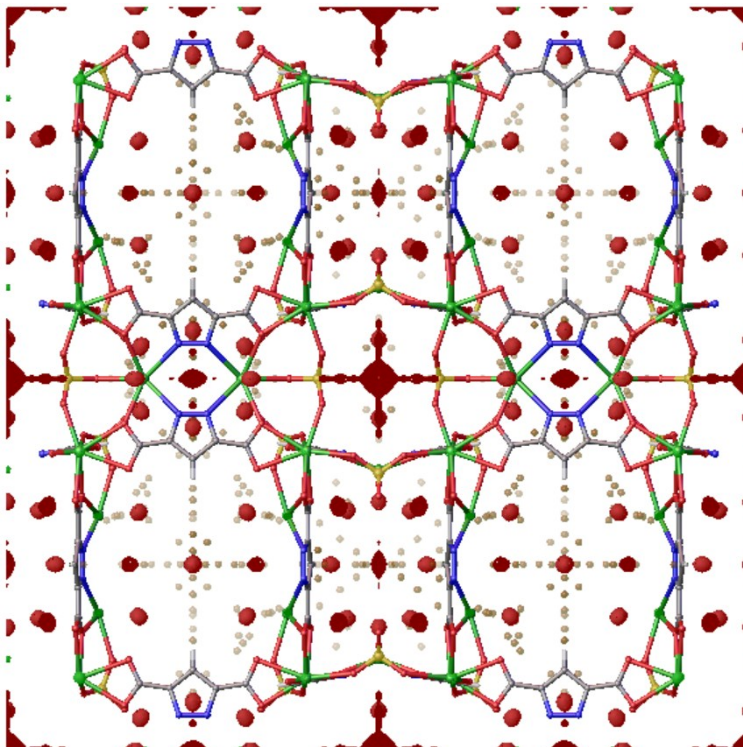

**Fig. S4** Electron density map in the cavity region of Eu-SCP produced by X-ray crystallography.

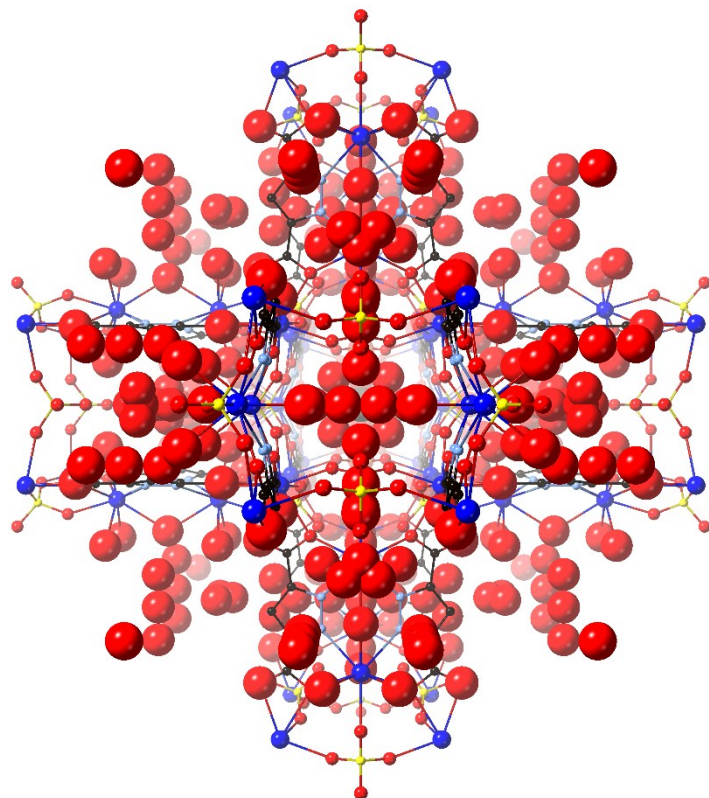

**Fig. S5** Proton-transfer pathways of Eu-SCP constructed by host sulfate, guest complex, coordinated and lattice water arrayed orderly.



---

**Section S5: Photography**

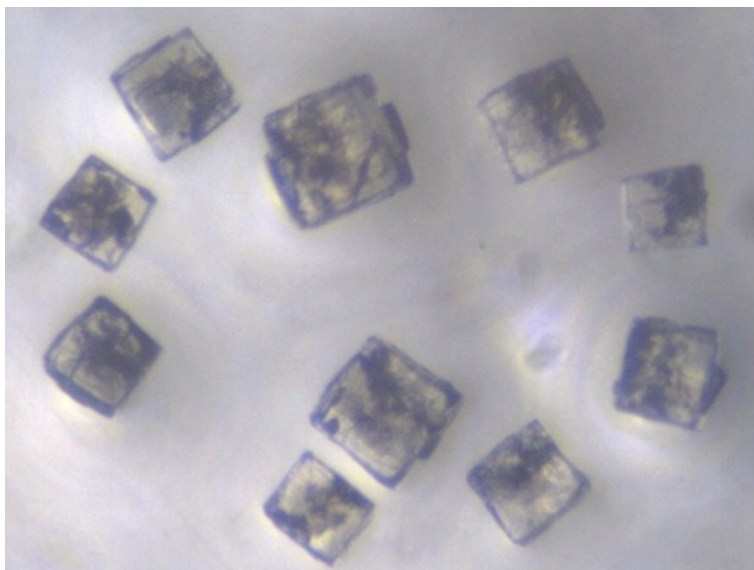

**Fig. S6** Microscopic image of Eu-SCP sample.

---

**Section S6: Fourier-Transform Infrared (FT-IR) Spectroscopy**

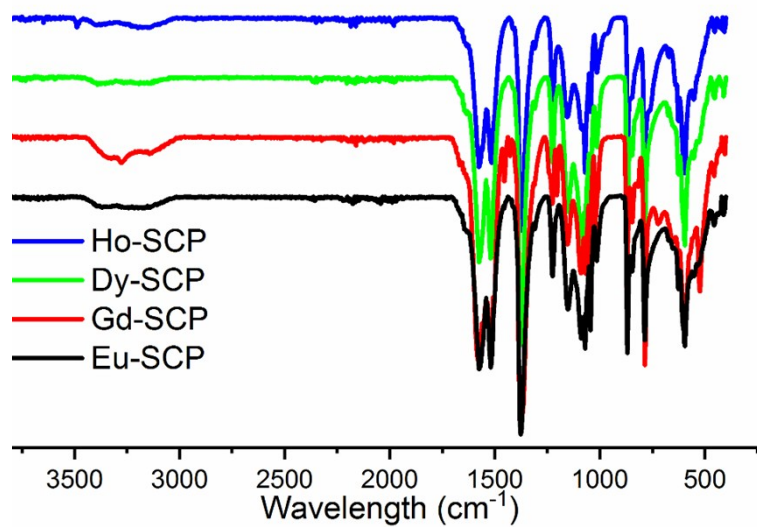

**Fig. S7** FT-IR spectra of Eu-SCP, Gd-SCP, Dy-SCP and Ho-SCP.

## Section S7: Powder X-ray Diffraction (PXRD)

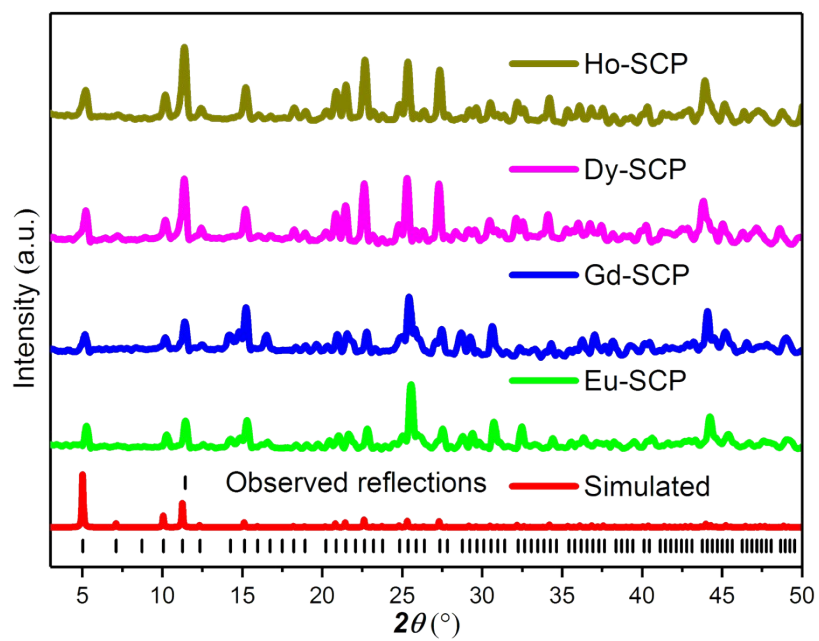

**Fig. S8** PXRD patterns of Eu-SCP, Gd-SCP, Dy-SCP and Ho-SCP.

## Section S8: Stability Analysis

### (a) Thermal Gravimetric Analysis (TGA)

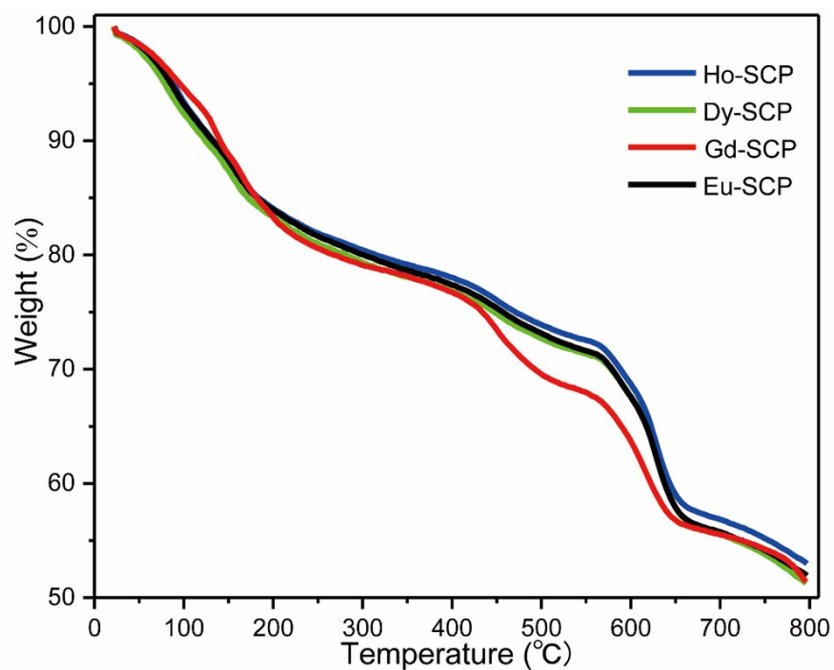

**Fig. S9** TGA curves of Eu-SCP, Gd-SCP, Dy-SCP and Ho-SCP in the air.

### (b) Thermal PXRD

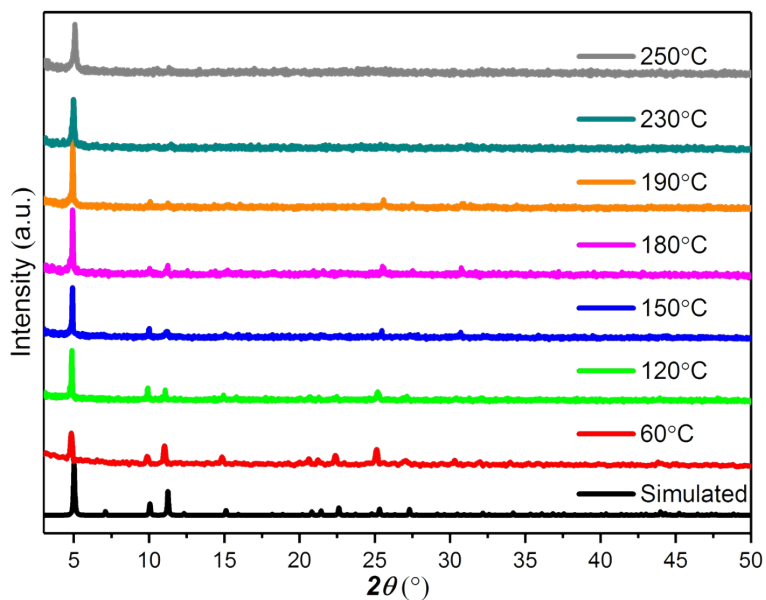

**Fig. S10** Thermal PXRD patterns of Eu-SCP, indicating that the sample could be stable upto 250 °C.

(c) Chemical Stability Analysis

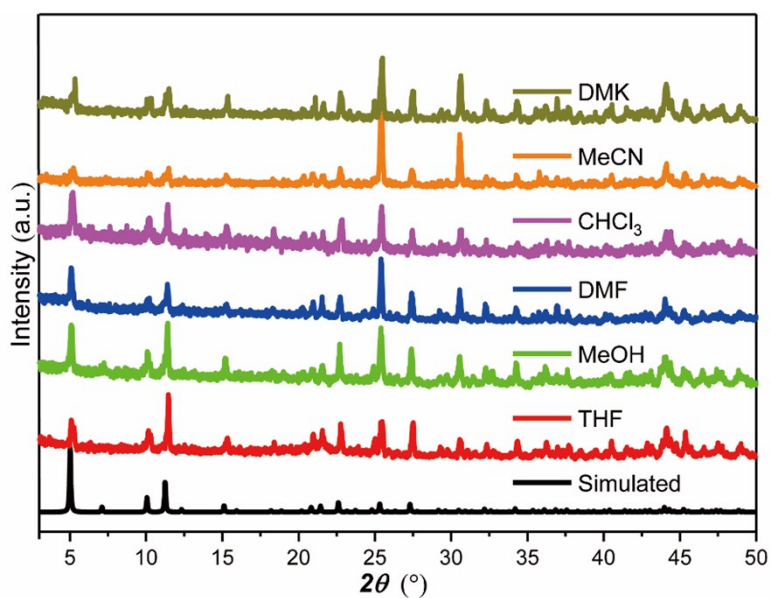

**Fig. S11** PXRd patterns of Eu-SCP in different organic solvents for 20 h.

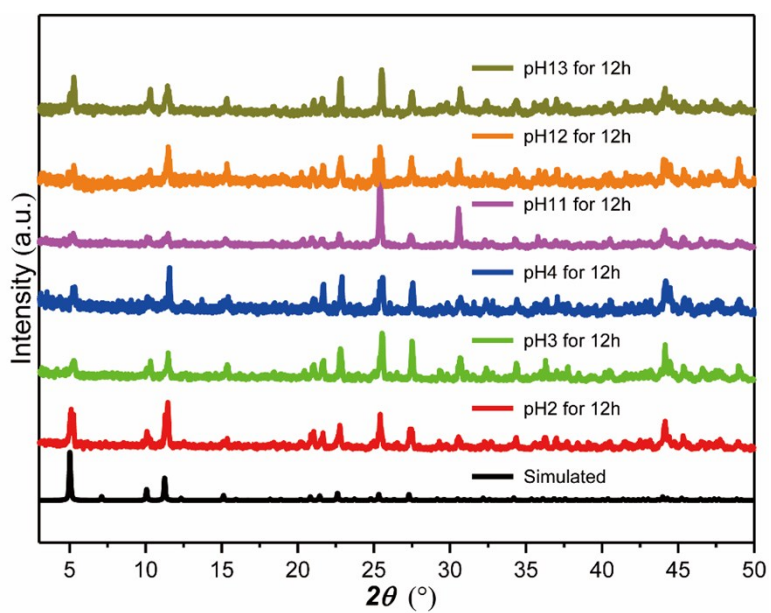

**Fig. S12** PXRd patterns of Eu-SCP in different pH water for 12 h.

---

## Section S9: Gas-Sorption Measurements

The samples were activated by soaking in  $\text{CH}_3\text{OH}$  three days and  $\text{CH}_3\text{OH}$  was renewed two times every day before testing.

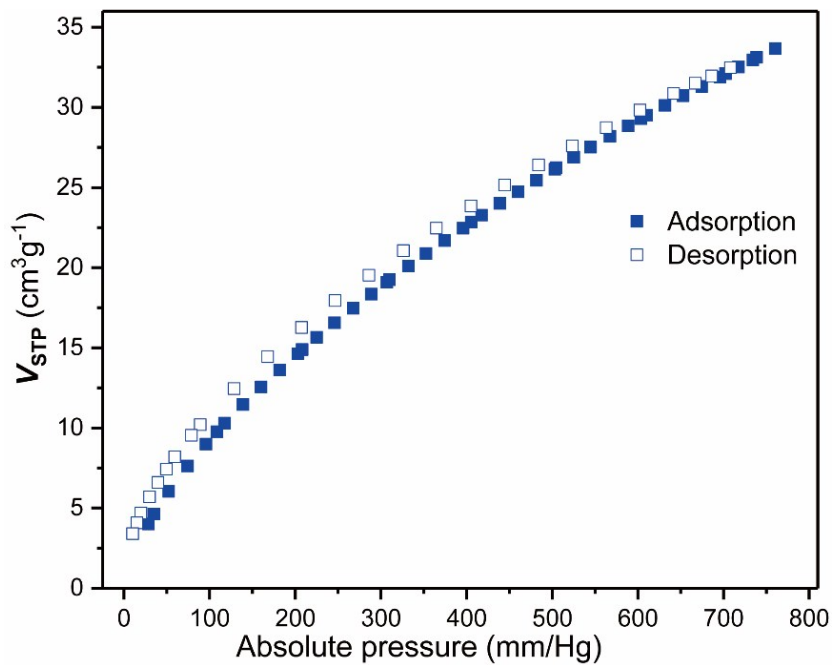

**Fig. S13**  $\text{CO}_2$  adsorption-desorption isotherms of Eu-SCP at 298 K.

---

**Section S10: Ultraviolet-Visible (UV-Vis) Spectroscopy**

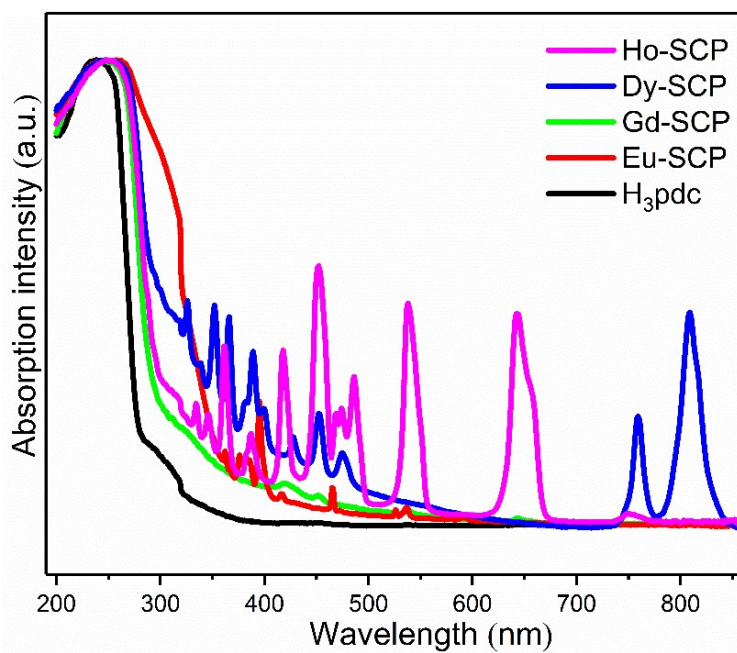

**Fig. S14** UV-Vis diffuse-reflectance spectra of Eu-SCP, Gd-SCP, Dy-SCP, Ho-SCP and H<sub>3</sub>PDC.

## Section S11: Photoluminescence

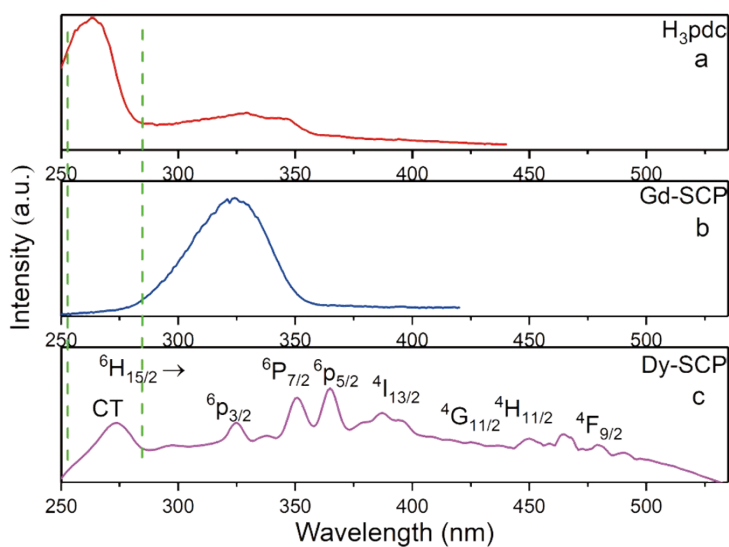

**Fig. S15** Excitation spectra of (a) H<sub>3</sub>PDC, (b) Gd-SCP and (c) Dy-SCP monitored at 460nm, 525nm and 573nm, respectively, at 298 K.

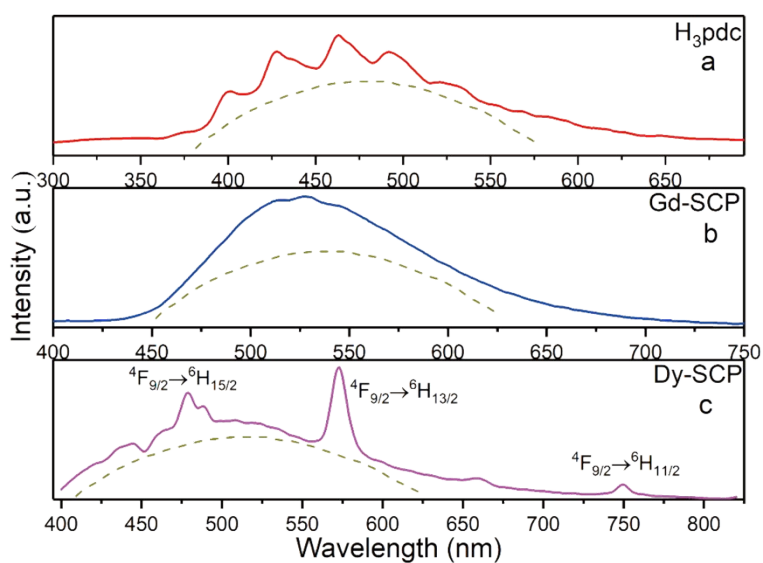

**Fig. S16** Emission spectra of (a) H<sub>3</sub>PDC, (b) Gd-SCP and (c) Dy-SCP monitored at 263nm, 323nm and 365nm, respectively, at 298 K.



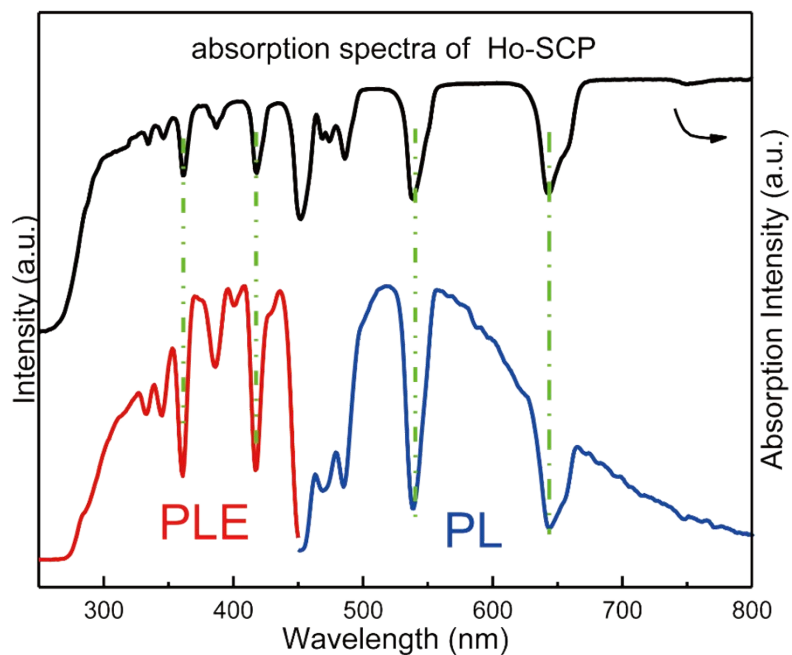

**Fig. S17** Excitation spectrum of Ho-SCP monitored at 560 nm (in red) and Emission spectrum of Ho-SCP monitored at 323 nm (in blue) at 298 K, consistent with the adsorption spectrum of Ho-SCP (in black).

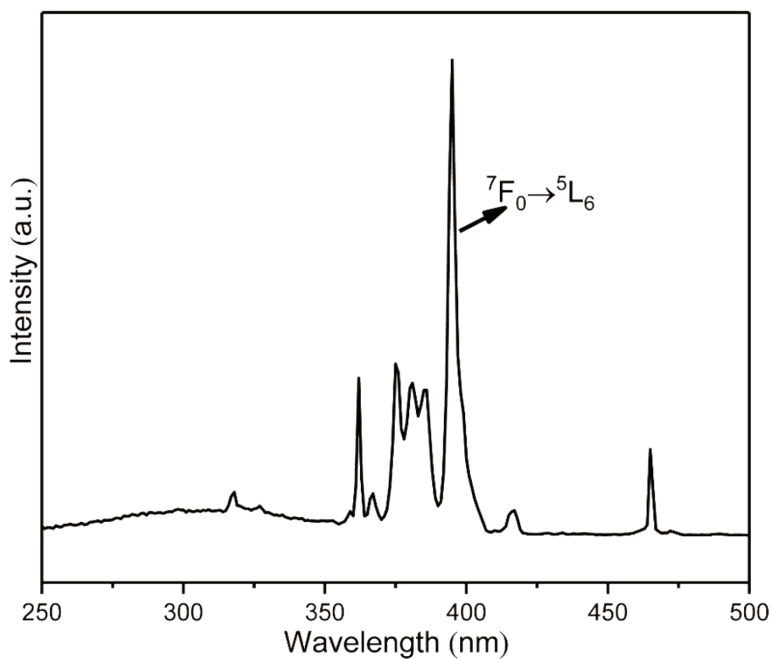

**Fig. S18** Excitation spectrum of Eu-SCP at 298 K.

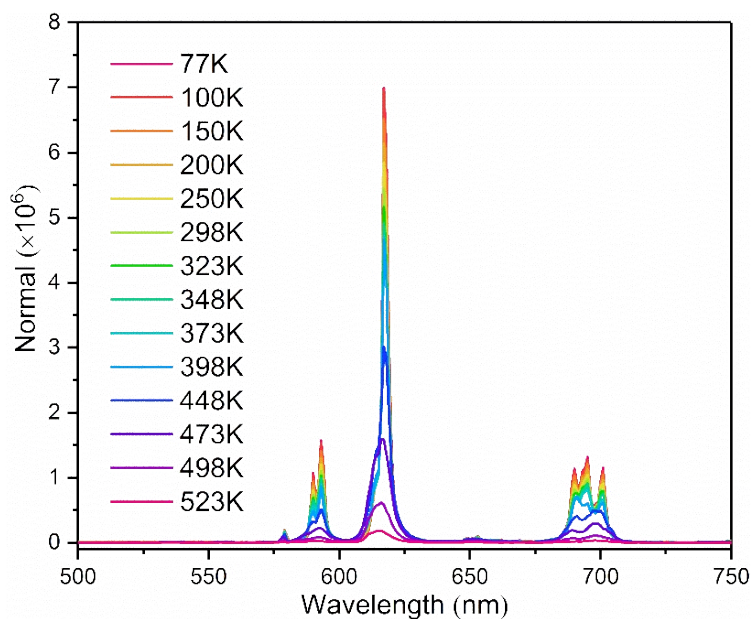

**Fig. S19** Fluorescence emission spectra ( $\lambda_{ex} = 395 \text{ nm}$ ) of Eu-SCP between 77 and 523

K.

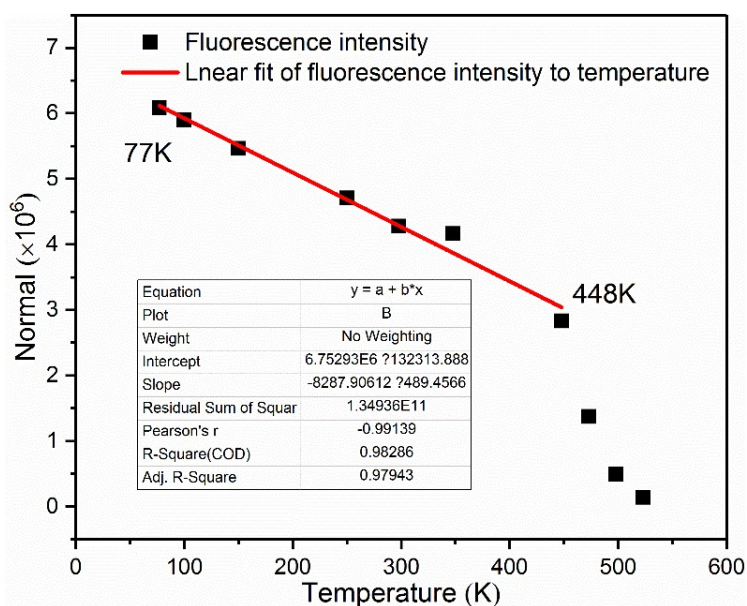

**Fig. S20** Linear Fitting of fluorescence intensity to temperature of Eu-SCP. It can be seen that there is a gradual decrease in the fluorescent intensity with rising the temperature from 77 to 448 K, following a linear correlation, then a more rapid drop because of the fluorescence significantly quenched when the temperature  $> 448 \text{ K}$ . This deviation from the linear fitting at temperature  $> 448 \text{ K}$  is probably owing to the departure of the bonded water molecules.

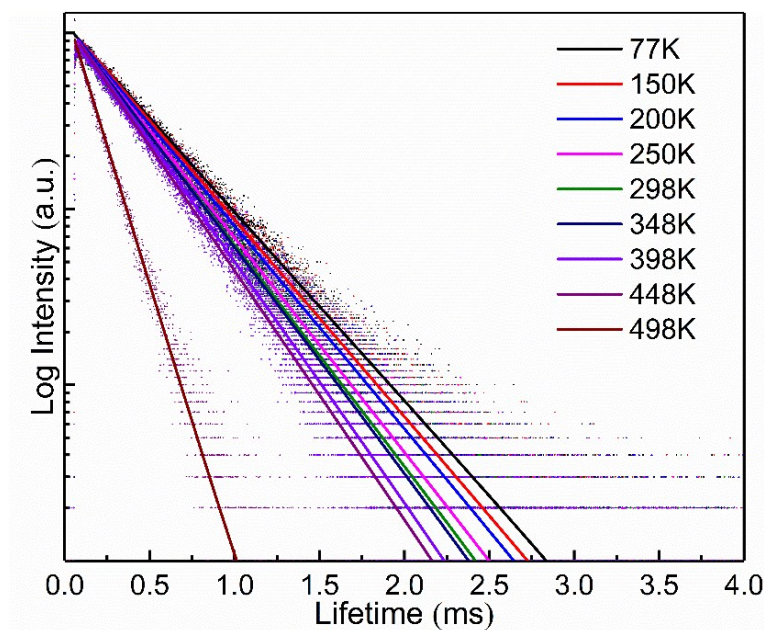

**Figure. S21** Temperature-dependent fluorescence lifetime diagram of Eu-SCP (77 ~ 498 K). It can be seen that the fluorescence lifetime of Eu-SCP decreases with increasing temperature, also obeying the linear relationship in the temperature range < 448 K.

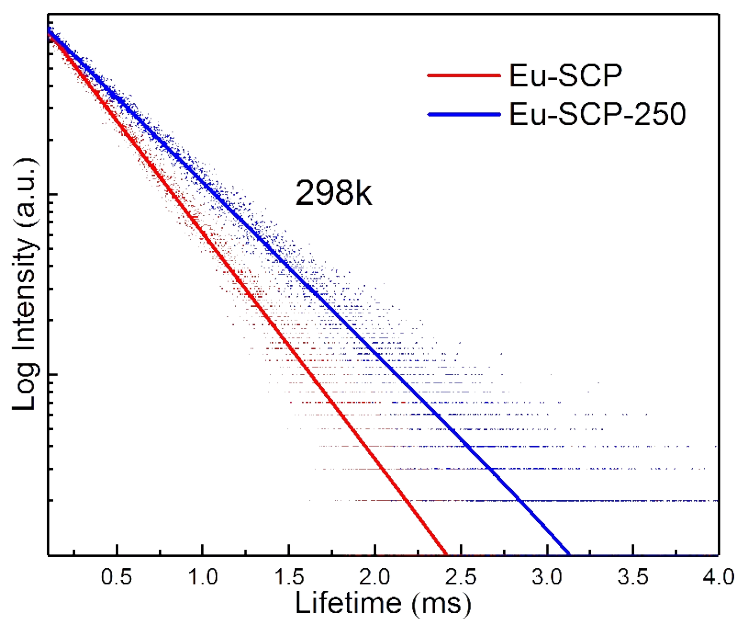

**Figure. S22** Fluorescence emission decays of fresh Eu-SCP and dehydrated Eu-SCP heated at 250 °C ( $\lambda_{\text{ex}} = 395 \text{ nm}$ ,  $\lambda_{\text{em}} = 395 \text{ nm}$ , lifetime = 348  $\mu\text{s}$  for fresh Eu-SCP, 462  $\mu\text{s}$  for dehydrated Eu-SCP) at 298 K.

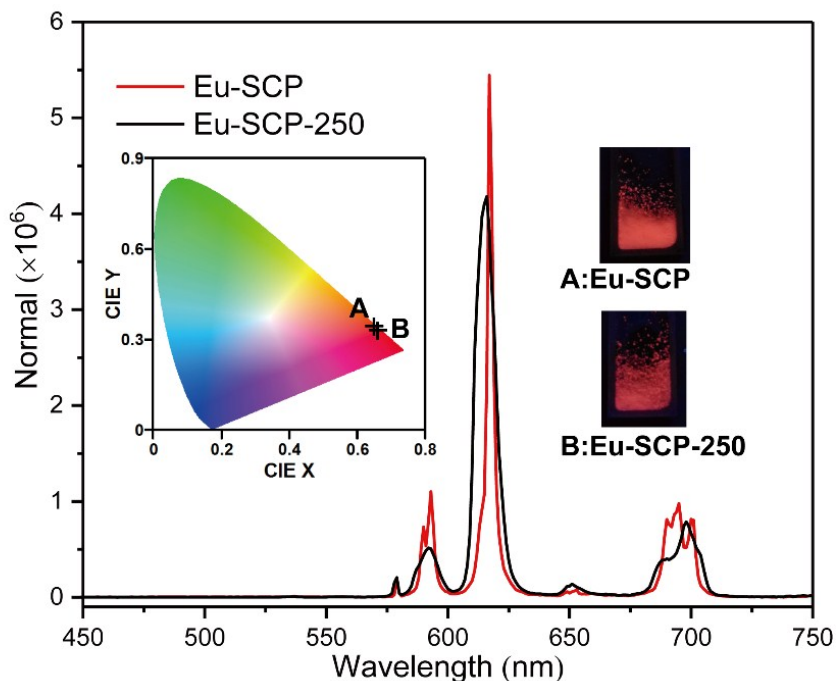

**Figure. S23** Fluorescence emission spectra of A: Eu-SCP (with CIE of  $x = 0.6481$ ,  $y = 0.345$ ) and B: Eu-SCP-250 (activated at 250 °C, with CIE  $x = 0.6632$ ,  $y = 0.3348$ ) at 298 K. By comparison, the dehydrated Eu-SCP displayed slightly wider fluorescence emission peak and longer fluorescence lifetime than the freshly-synthesized sample.

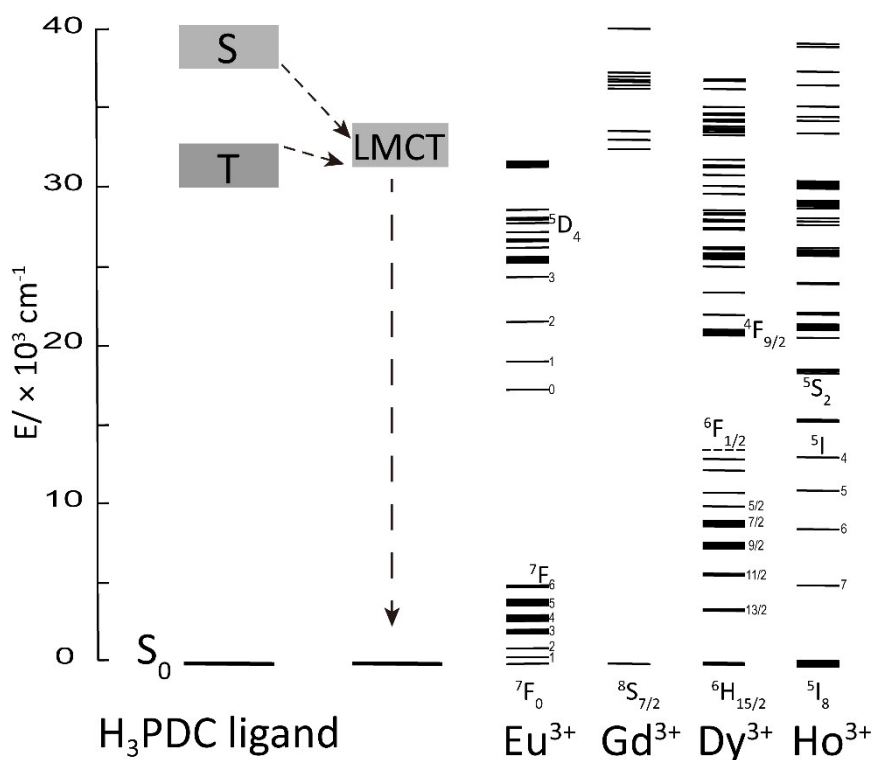

**Figure. S24** Energy level diagram of  $\text{Eu}^{3+}$ ,  $\text{Gd}^{3+}$ ,  $\text{Dy}^{3+}$  and  $\text{Ho}^{3+}$  ions and  $\text{H}_3\text{PDC}$  ligand,

---

referring to the related literature on LMCT energy transfer.<sup>1</sup> The dashed arrows represent possible non-radiative energy transfer pathways.

All the compounds were monitored at the positions of the maximum excitation/emission peaks. There is an intense adsorption band centered at 250 nm in the UV-Vis adsorption spectrum of H<sub>3</sub>PDC (Fig. S15), which could be attributed to  $\pi$ - $\pi^*$  electron transition. The emission spectrum (Fig. S16b) of Gd-SCP has a broad band originated from the PDC<sup>3-</sup> ligand, because the excited energy level of Gd<sup>3+</sup> ion is much higher than the energy level of ligand triplet state, namely where ligand to metal energy transfer (LMCT) process has been inhibited. Dy-SCP not only has the characteristic peaks related to Dy<sup>3+</sup> ion but also has the typical band of PDC<sup>3-</sup> ligand (Fig. S15c and Fig. S16c). As shown in the Fig. S17, the downward peaks of the emission spectrum of Ho-SCP could be due to the cancellation of PDC<sup>3-</sup> characteristic band by the Ho<sup>3+</sup> ion. Among Ln-SCP, only Eu-SCP displays the fluorescence that can be seen by naked eyes. As shown in Fig. S14, the characteristic band of PDC<sup>3-</sup> ligand is shaded by the strong emission peaks in relation to  $5D^0-5F^n$  ( $n = 0,1,2,3,4$ ) transitions of Eu<sup>3+</sup> ion, which indicates the effective ligand to metal energy transfer of Eu-SCP.

## Section S12: Magnetism

(a) Plots of  $\chi_m T$  and  $\chi_m^{-1}$  versus  $T$

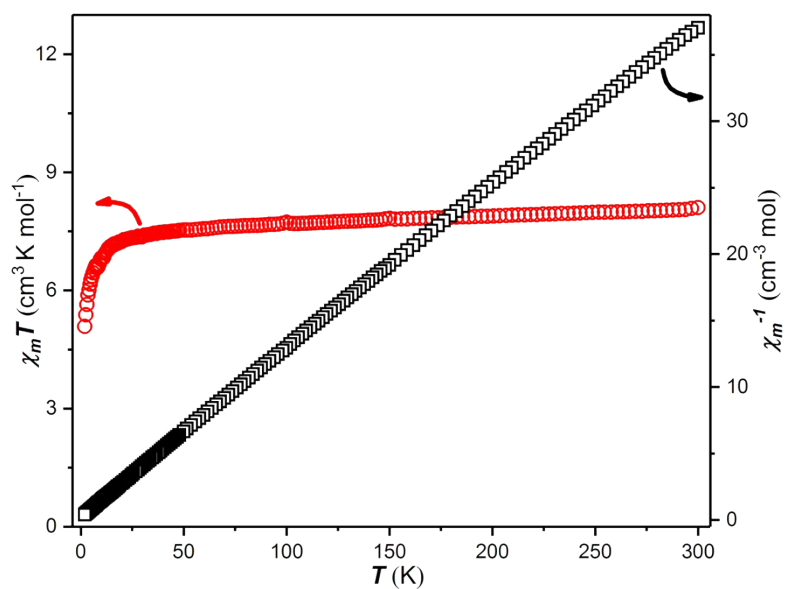

**Fig. S25** Temperature dependence of  $\chi_m T$  and  $\chi_m^{-1}$  for Gd-SCP.

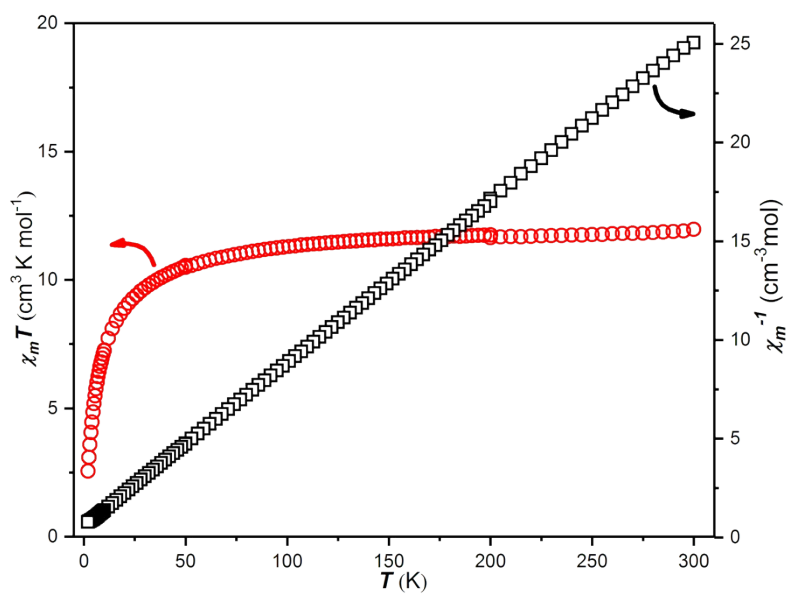

**Fig. S26** Temperature dependence of  $\chi_m T$  and  $\chi_m^{-1}$  for Dy-SCP.

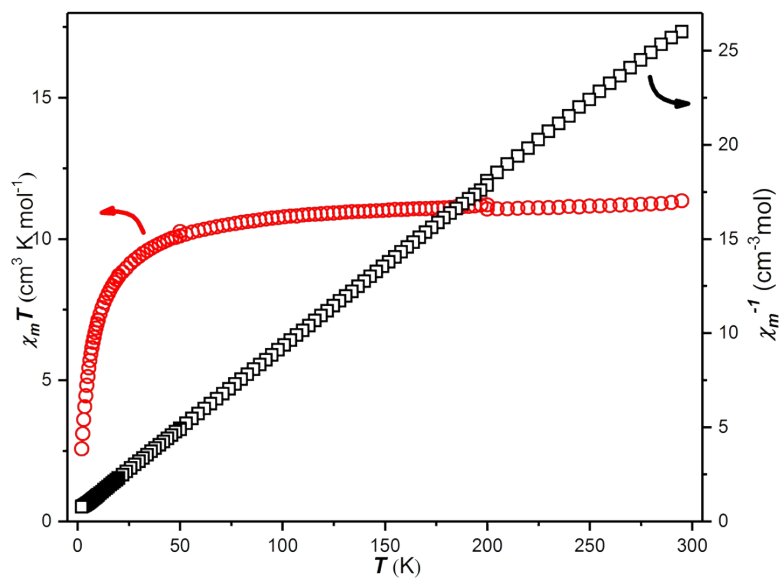

**Fig. S27** Temperature dependence of  $\chi_m T$  and  $\chi_m^{-1}$  for Ho-SCP.

(b) Plots of  $\chi_m'$  and  $\chi_m''$  versus  $T$

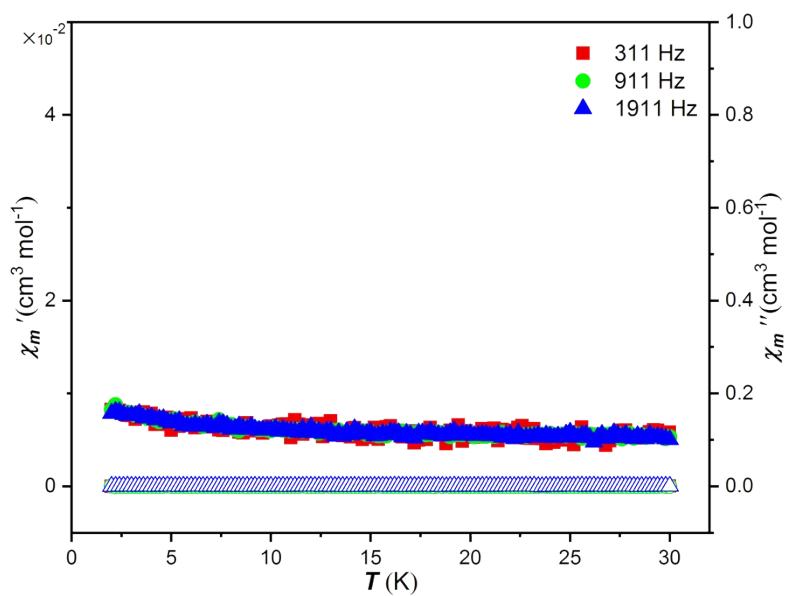

**Fig. S28** Temperature dependence of ac susceptibilities,  $\chi_m'$  and  $\chi_m''$ , at different frequencies for Eu-SCP.

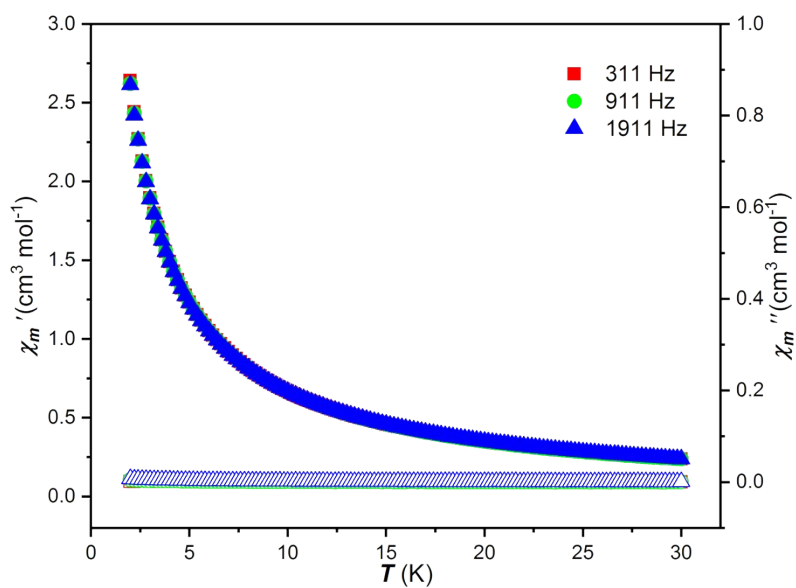

**Fig. S29** Temperature dependence of ac susceptibilities,  $\chi_m'$  and  $\chi_m''$ , at different frequencies for Gd-SCP.

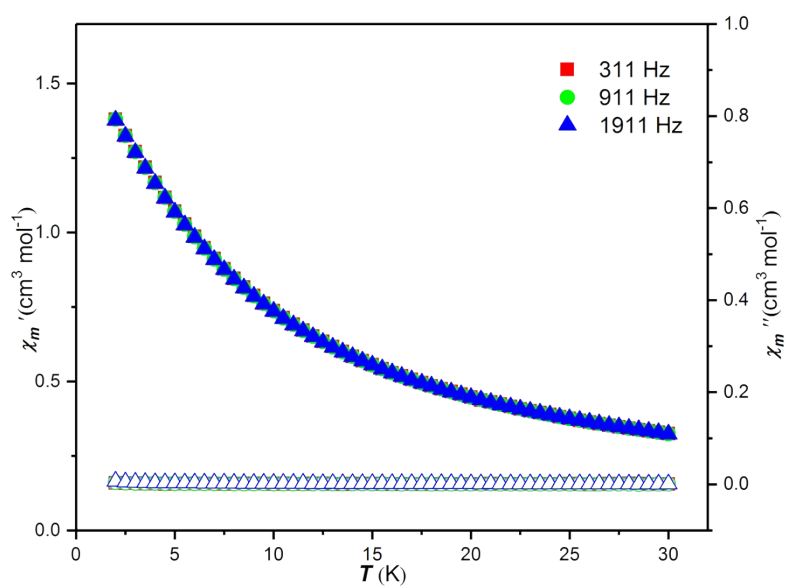

**Fig. S30** Temperature dependence of ac susceptibilities,  $\chi_m'$  and  $\chi_m''$ , at different frequencies for Dy-SCP.



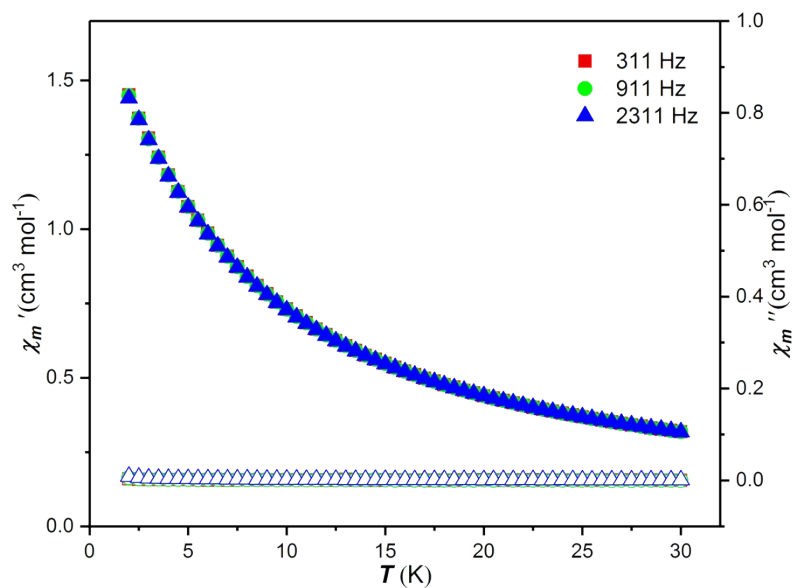

**Fig. S31** Temperature dependence of ac susceptibilities,  $\chi_m'$  and  $\chi_m''$ , at different frequencies for Ho-SCP.

(c) Plots of  $M$  versus  $H$

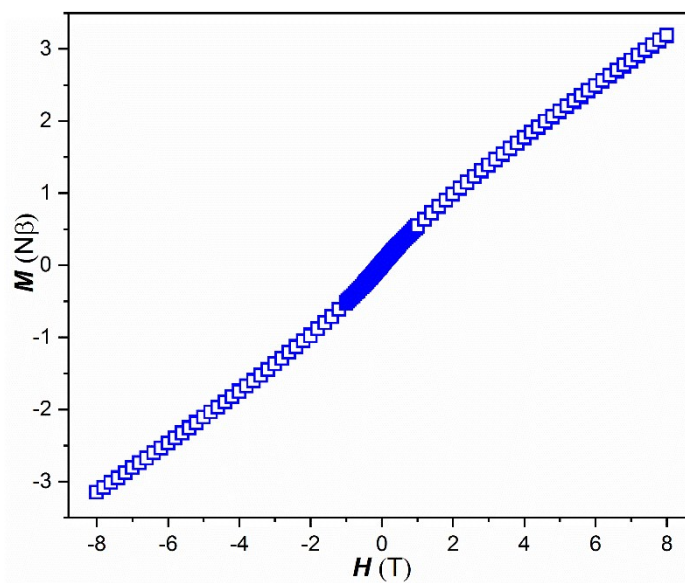

**Fig. S32** Plot of  $M$  versus  $H$  for Eu-SCP.

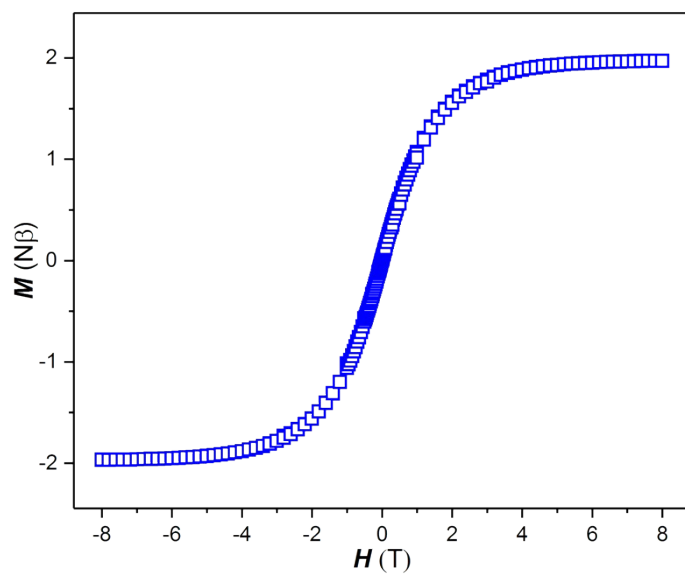

**Fig. S33** Plot of  $M$  versus  $H$  for Gd-SCP.

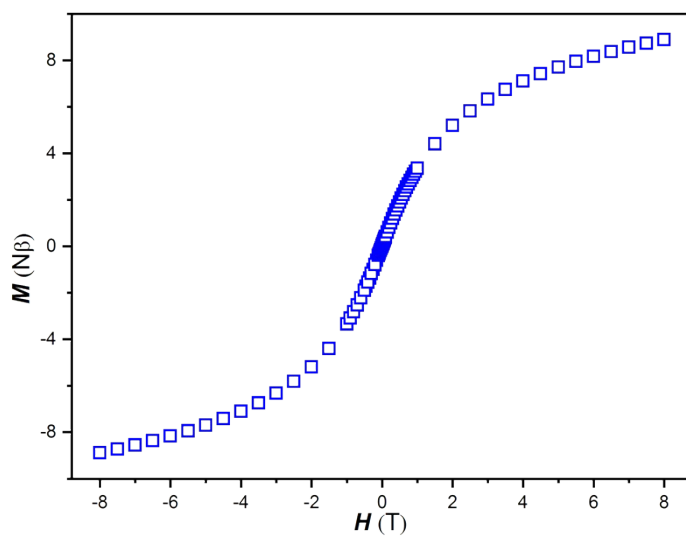

**Fig. S34** Plot of  $M$  versus  $H$  for Dy-SCP.

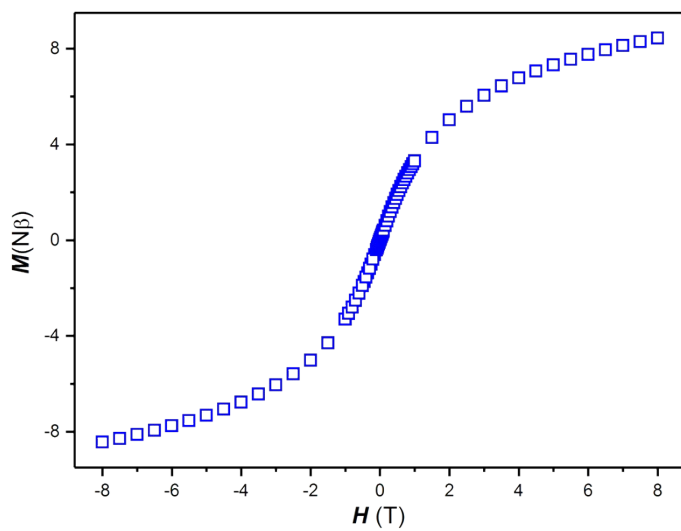

**Fig. S35** Plot of  $M$  versus  $H$  for Ho-SCP.

### Section S13: Proton conduction

**Impedance analysis:** The samples were put into a home-made mold with a radius of 0.2 cm to get circular pellets, whose thickness was measured by a Vernier caliper. Then the pellets were smeared on both sides by silver colloid, which were for fixing copper wires. The proton conductive capacities were estimated by using a Zahner (IM6) electrochemical impedance spectrometer, over a frequency range from 100 mHz to 10 MHz, under varying temperatures (25 to 65 °C) and different relative humidity (RH, 33% to 97%). The proton conductivity was calculated by using the following equation

$$\sigma = \frac{l}{SR}$$

where  $\sigma$  is the conductivity ( $S\text{ cm}^{-1}$ ).  $l$  is the thickness (cm) of the pellet,  $S$  is the cross-sectional area ( $\text{cm}^2$ ) of the pellet,  $R$  is the bulk resistance ( $\Omega$ ). The activation energy ( $E_a$ ) was calculated from the following equation

$$\ln \sigma_T = \ln \sigma_0 - \frac{E_a}{KT}$$

where  $\sigma$  is the conductivity ( $S\text{ cm}^{-1}$ ),  $K$  is the Boltzmann constant (eV/K) and  $T$  is the temperature (K).

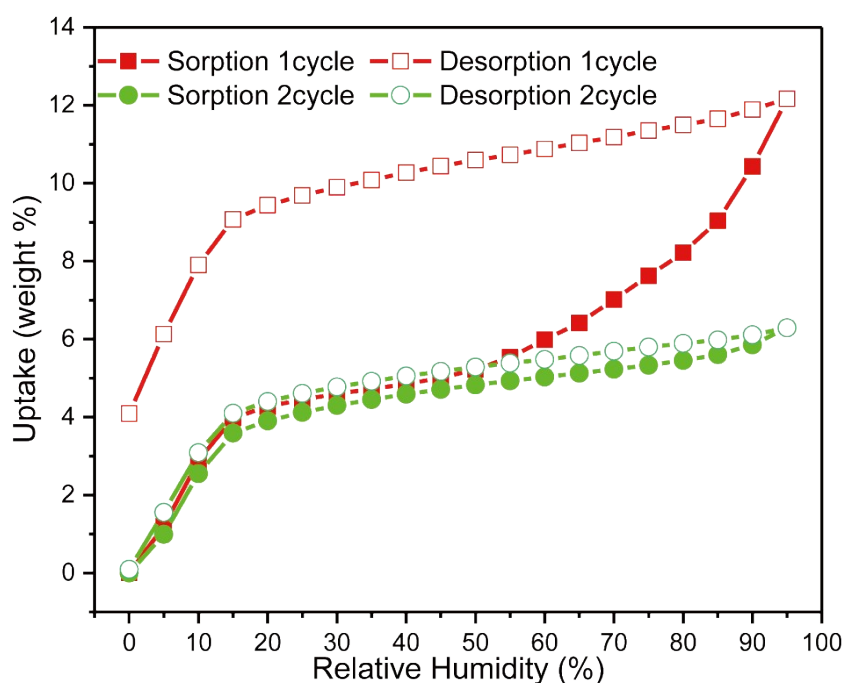

**Fig. S36** Water vapor adsorption-desorption isotherms of Eu-SCP.

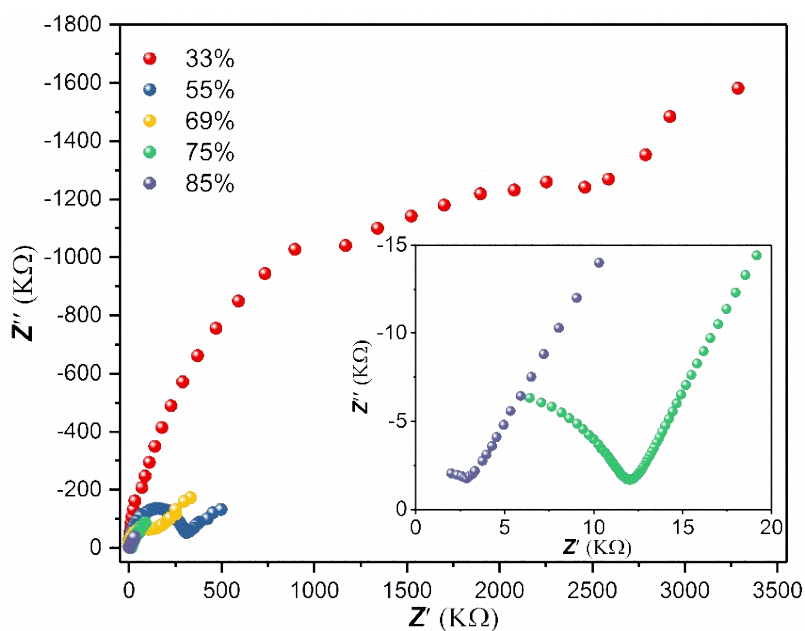

**Fig. S37** Nyquist plots (at different RH) of Eu-SCP pre-heated to 190 °C.

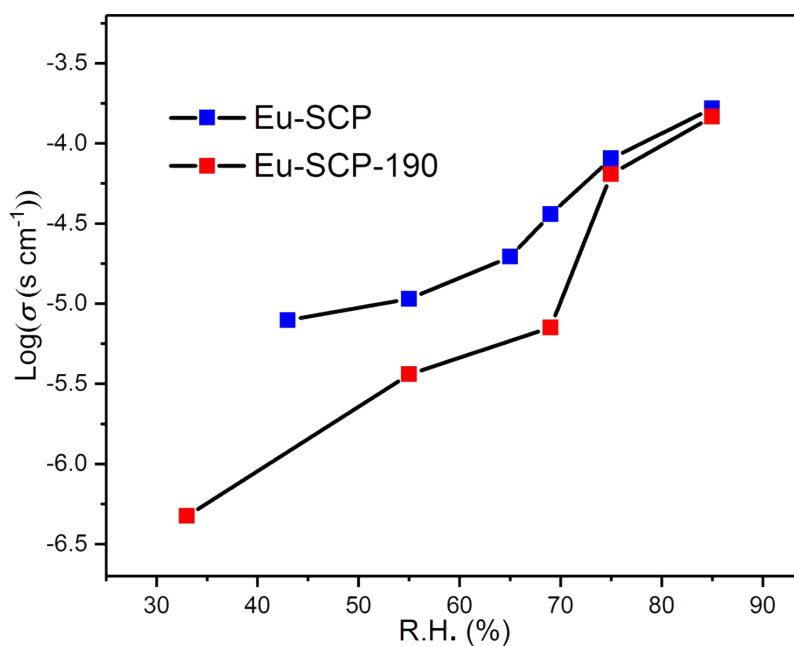

**Fig. S38** Relative humidity dependences of proton conductivity of the freshly-synthesized Eu-SCP and its dehydrated form (pre-heated at 190 °C) at room temperature. Under < 75% RH, its  $\sigma$  values are significantly lower than that of the sample untreated thermally; while at >75% RH, two sets of  $\sigma$  data are close to each other. By comparing  $\sigma$  values of as-synthesized and thermally-treated samples, it could be concluded that the coordinated and free water molecules significantly contribute to proton conduction.

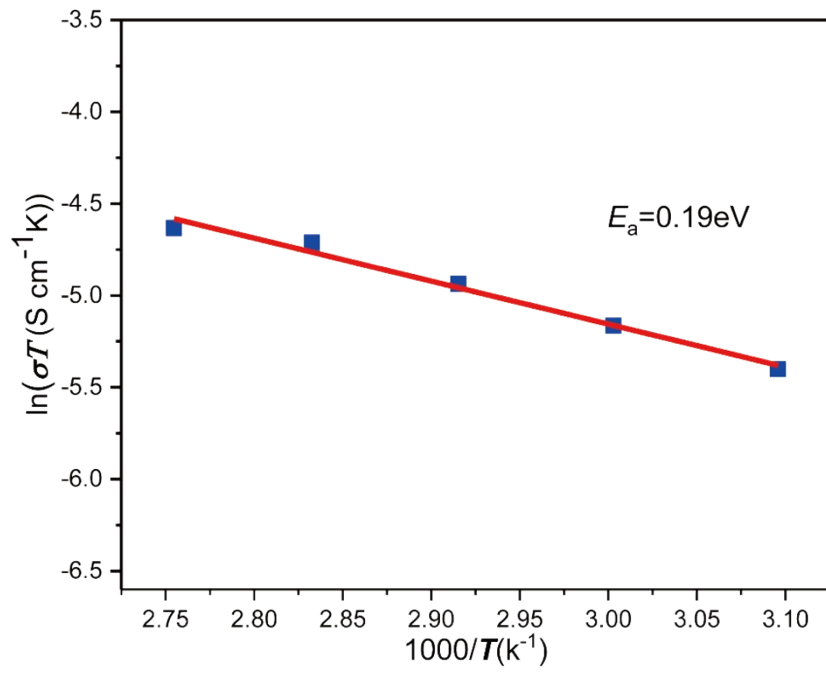

**Fig. S39** Arrhenius plot of proton conductivity of Eu-SCP under 55% R.H. condition.

**Table S2** List of the selected studies with high proton conductivity at 298-313 K

| Compound                                                                                                                                         | $\sigma / \text{S cm}^{-1}$ | $E_a / \text{eV}$ | Condition        | Reference |
|--------------------------------------------------------------------------------------------------------------------------------------------------|-----------------------------|-------------------|------------------|-----------|
| EuL                                                                                                                                              | $1.0 \times 10^{-7}$        | 0.91              | 25 °C, 97% R.H.  | 2         |
| DyL                                                                                                                                              | $1.52 \times 10^{-7}$       | 0.87              | 25 °C, 97% R.H.  | 2         |
| LaCr(ox) <sub>3</sub> ·10H <sub>2</sub> O                                                                                                        | $1.0 \times 10^{-5}$        | 0.32              | 25 °C, 95% R.H.  | 3         |
| [Eu <sub>2</sub> (CO <sub>3</sub> )(ox) <sub>2</sub> (H <sub>2</sub> O) <sub>2</sub> ]·4H <sub>2</sub> O                                         | $1.01 \times 10^{-5}$       | 0.47              | 25 °C, 0% R.H.   | 4         |
| YbO(OH)P-CEFs                                                                                                                                    | $7.61 \times 10^{-5}$       | 0.57              | 25 °C, 95% R.H.  | 5         |
| NdTBP-CEFs                                                                                                                                       | $2.38 \times 10^{-4}$       | 0.32              | 25 °C, 95% R.H.  | 5         |
| CoLa-II-SC                                                                                                                                       | $3.05 \times 10^{-4}$       | 0.42              | 25 °C, 95% R.H.  | 6         |
| GdHPA-II                                                                                                                                         | $3.2 \times 10^{-4}$        | 0.23              | 25 °C, 95% R.H.  | 7         |
| Eu-SCP                                                                                                                                           | $1.19 \times 10^{-3}$       | 0.19              | 21 °C, 98% R.H.  | This Work |
| PCMOF-5                                                                                                                                          | $1.3 \times 10^{-3}$        | 0.16              | 25 °C, 97% R.H.  | 8         |
| N <sub>2</sub> H <sub>5</sub> [CeEu(C <sub>2</sub> O <sub>4</sub> ) <sub>4</sub> (N <sub>2</sub> H <sub>5</sub> )]·4H <sub>2</sub> O             | $3.42 \times 10^{-3}$       | 0.1               | 25 °C, 100% R.H. | 9         |
| N <sub>2</sub> H <sub>5</sub> [Nd <sub>2</sub> (C <sub>2</sub> O <sub>4</sub> ) <sub>4</sub> (N <sub>2</sub> H <sub>5</sub> )]·4H <sub>2</sub> O | $2.7 \times 10^{-3}$        | 0.11              | 25 °C, 100% R.H. | 9         |

---

## Section S14: References

- [1] C. B. Liu, R. A. S. Ferreira, F. A. Almeida Paz, A. Cadiou, L. D. Carlos, L. S. Fu, J. Rocha and F. N. Shi, *Chem. Commun.*, 2012, **48**, 7964-7966.
- [2] M. Zhu, Z.-M. Hao, X.-Z. Song, X. Meng, S.-N. Zhao, S.-Y. Song and H.-J. Zhang, *Chem. Commun.*, 2014, **50**, 1912-1914.
- [3] H. Okawa, M. Sadakiyo, K. Otsubo, K. Yoneda, T. Yamada, M. Ohba and H. Kitagawa, *Inorg. Chem.*, 2015, **54**, 8529-8535.
- [4] X. Zhao, M. Wong, C. Mao, T. X. Trieu, J. Zhang, P. Feng and X. Bu, *J. Am. Chem. Soc.*, 2014, **136**, 12572-12575.
- [5] C. Xiao, Y. Wang, L. Chen, X. Yin, J. Shu, D. Sheng, Z. Chai, T. E. Albrecht-Schmitt and S. Wang, *Chem-Eur. J.*, 2015, **21**, 17591-17595.
- [6] S.-S. Bao, K. Otsubo, J. M. Taylor, Z. Jiang, L.-M. Zheng and H. Kitagawa, *J. Am. Chem. Soc.*, 2014, **136**, 9292-9295.
- [7] R. M. P. Colodrero, K. E. Papathanasiou, N. Stavgianoudaki, P. Olivera-Pastor, E. R. Losilla, M. A. G. Aranda, L. Leon-Reina, J. Sanz, I. Sobrados, D. Choquesillo-Lazarte, J. M. Garcia-Ruiz, P. Atienzar, F. Rey, K. D. Demadis and A. Cabeza, *Chem. Mater.*, 2012, **24**, 3780-3792.
- [8] J. M. Taylor, K. W. Dawson and G. K. H. Shimizu, *J. Am. Chem. Soc.*, 2013, **135**, 1193-1196.
- [9] K. Zhang, X. Xie, H. Li, J. Gao, L. Nie, Y. Pan, J. Xie, D. Tian, W. Liu, Q. Fan, H. Su, L. Huang and W. Huang, *Adv. Mater.*, 2017, **29**, 1701804.
